# Supplementary material for: Distribution characteristics and risk assessment of microplastics in Lake Bosten
Source: Research Square preprint supplement (doi:10.21203/rs.3.rs-6744537/v1), 2025-06-25
Supplement: Supplementary file 1 [file a38103b5f45e28b39d1748f5.docx]

Table S1 Polymer toxicity scores

| Polymer Name | Abbreviations | toxicity score (Sn) |
| --- | --- | --- |
| Polyethylene | PE | 11 |
| Polypropylene | PP | 1 |
| Polystyrene | PS | 30 |
| Polyvinyl chloride | PVC | 10511 |
| Polyethylene glycol terephthalate | PET | 4 |
| Polyamide | PA | 47 |
| polyvinyl alcohol | PVA | 1 |
